# Supplementary material
Source: Springer Nature journal article supplement (https://www.springermedizin.de/resource/supplementary/12889_2009_1769_MOESM2_ESM.pdf/9503976)

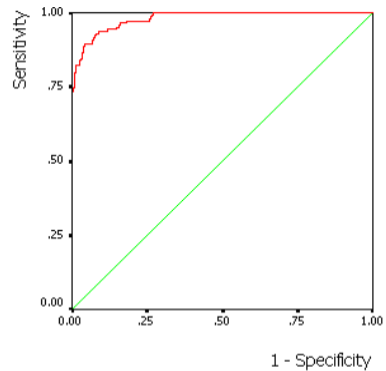

A. In the training set

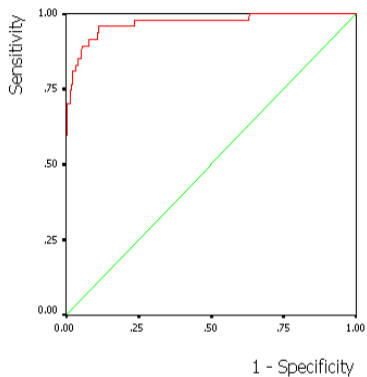

B. In the validation set

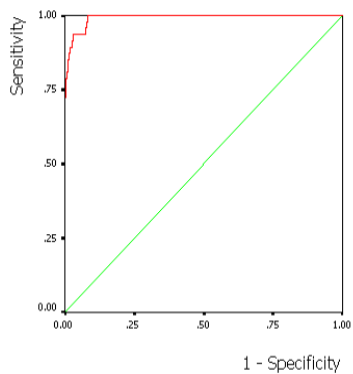

C. In the testing set

Supplement: MOESM2 [file 9503976]
